# Supplementary material for: New insights into the nucleation of magnesium hydroxide and the influence of poly(acrylic acid) during the early stages of Mg(OH)2 crystallisation
Source: Royal Society of Chemistry journal article supplement (doi:10.1039/d2ce00896c), 2022-01-01
Supplement: d2ce00896c1.pdf [file d2ce00896c1.pdf]

## Electronic Supplementary Information (ESI) for

### New Insights into the Nucleation of Magnesium Hydroxide and the Influence of Poly(Acrylic Acid) during the Early Stages of Mg(OH)<sub>2</sub> Crystallisation

*Johanna Scheck,<sup>a#</sup> John K. Berg,<sup>a#</sup> Markus Drechsler,<sup>b</sup> Andreas Kempter,<sup>c</sup>  
Alexander E. S. Van Driessche,<sup>d</sup> Helmut Cölfen,<sup>a</sup> Denis Gebauer,<sup>e\*</sup> and Matthias Kellermeier<sup>f\*</sup>*

<sup>a</sup> Physical Chemistry, University of Konstanz, Universitätsstrasse 10, D-78457 Konstanz, Germany.

<sup>b</sup> Bavarian Polymer Institute (BPI), Keylab “Electron and Optical Microscopy”, University of Bayreuth, Universitätsstr. 30, D-95440 Bayreuth, Germany.

<sup>c</sup> Inorganic Materials & Synthesis, BASF SE, Carl-Bosch-Str. 38, D-67056 Ludwigshafen, Germany.

<sup>d</sup> Instituto Andaluz de Ciencias de la Tierra (IACT), CSIC – University of Granada, E-18100 Armilla, Granada, Spain.

<sup>e</sup> Institute of Inorganic Chemistry, Leibniz University Hannover, Callinstr. 9, D-30167 Hannover, Germany.

<sup>f</sup> Material Science, BASF SE, Carl-Bosch-Strasse 38, D-67056 Ludwigshafen, Germany.

\*Corresponding authors: gebauer@acc.uni-hannover.de; matthias.kellermeier@basf.com

# These authors contributed equally to this work

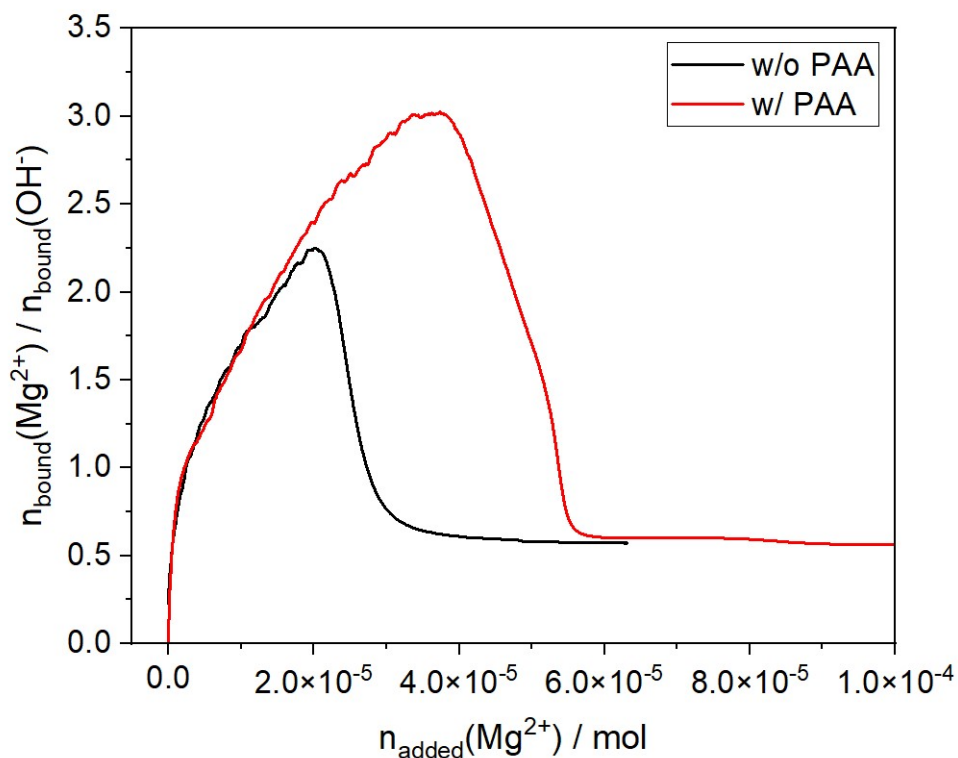

**Figure S1.** Evolution of the molar ratio of bound magnesium and hydroxide ions upon continuous addition of 20 mM  $\text{MgCl}_2$  solution (at a rate of 0.01 mL/min) into a reservoir of water (initially 50 mL) containing no (black line) or 10 ppm (red line) poly(acrylic acid) (cf. Figures 1b and 4b in the main text). Note that the  $\text{Mg}^{2+}/\text{OH}^-$  ratio in the associated species increases during the pre-nucleation stage from ca. 0.3 to >2.2 at the time of nucleation in the additive-free experiment, while values up to 3.0 are reached in the presence of PAA. After nucleation, the  $\text{Mg}^{2+}/\text{OH}^-$  ratio decreases rapidly and approaches the expected level of 0.5, whereby any remaining deviations from the 1:2 stoichiometry are tentatively ascribed to the ideal treatment of the non-ideal solutions (cf. Figure S3).

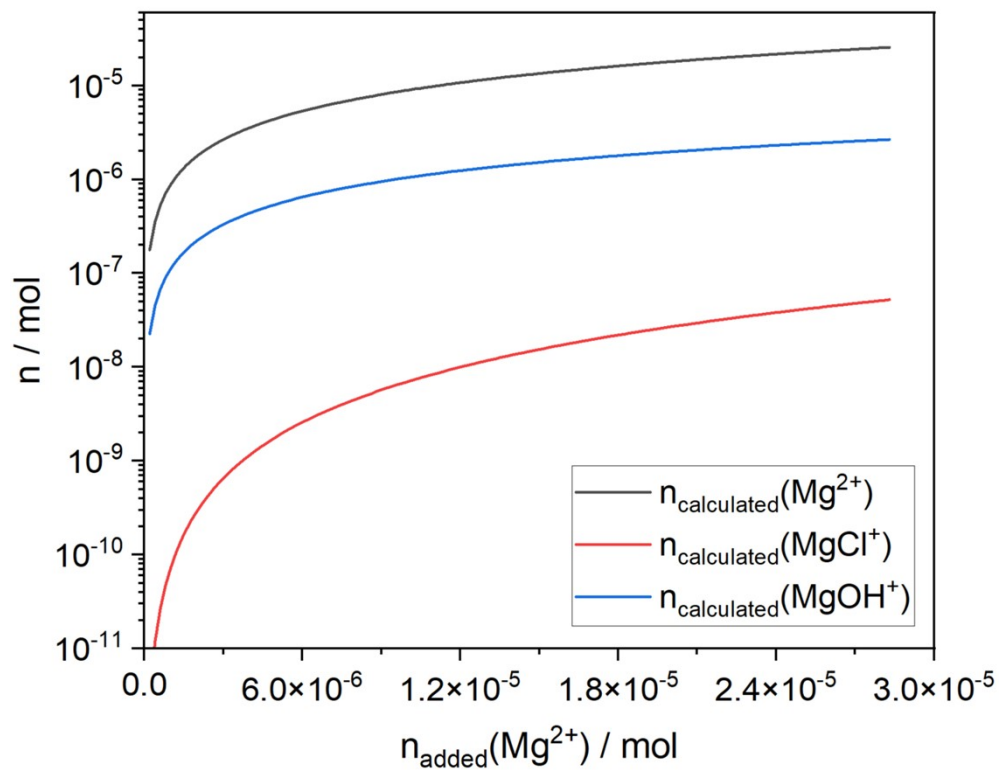

**Figure S2.** Plot of the molar amounts of  $\text{Mg}^{2+}$ ,  $\text{MgCl}^{+}$  and  $\text{MgOH}^{+}$  predicted to occur in solution at pH 11.0 during titration of 50 mL water with 20 mM  $\text{MgCl}_2$  at a rate of 0.01 mL/min (cf. Figure 1a in the main text). Calculations were performed for the pre-nucleation regime (i.e. up to the maximum in Figure 1a) with the PHREEQC software package<sup>S1</sup> using the Thermoddem database<sup>S2</sup> and excluding equilibration with atmospheric  $\text{CO}_2$ .

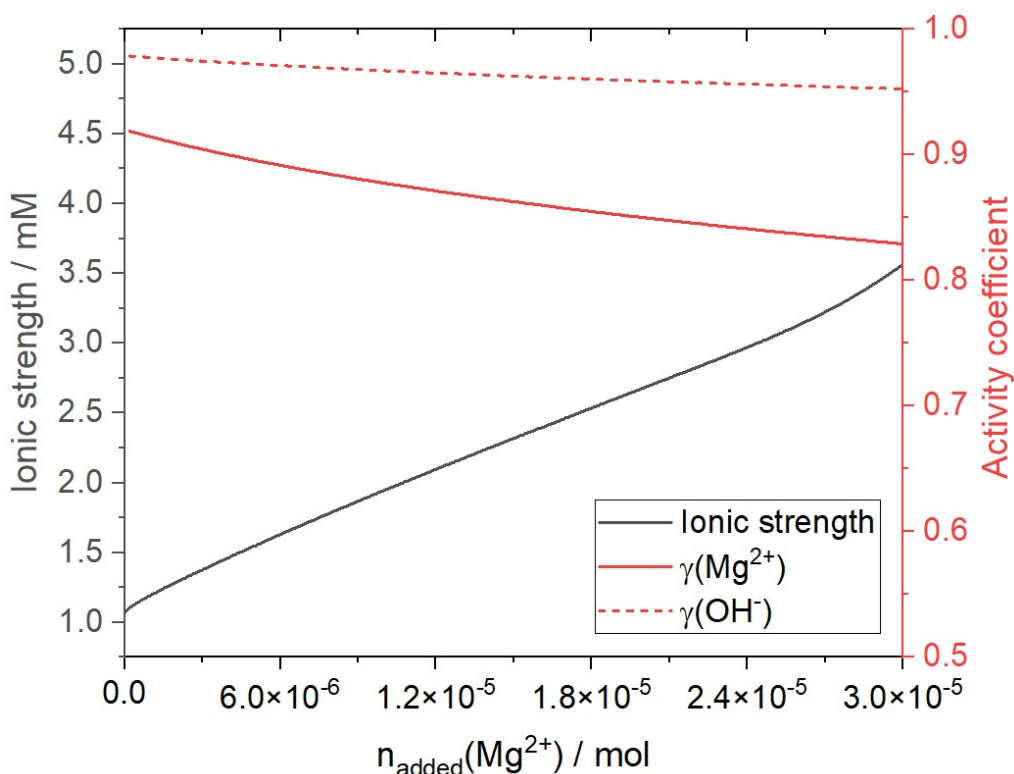

**Figure S3.** Development of the total ionic strength (grey line, left y-axis) and the activity coefficients of magnesium (full red line, right y-axis) and hydroxide (dashed red line, right y-axis) ions during titration of 50 mL water with 20 mM  $\text{MgCl}_2$  at a rate of 0.01 mL/min and a constant pH of 11.0 (cf. Figure 1a in the main text). The ionic strength was calculated based on the dosed amounts of  $\text{MgCl}_2$  and  $\text{NaOH}$ , assuming complete dissociation and no complexation. Activity coefficients ( $\gamma$ ) were obtained from solution speciation modeling performed with the PHREEQC software package<sup>S1</sup> using the Thermoddem database<sup>S2</sup> and excluding equilibration with atmospheric  $\text{CO}_2$ . Note that the deviation from ideality ( $\gamma \approx 1$ ) increases in the course of the titration experiment and is more pronounced for the divalent magnesium cation, which most likely accounts for the parallel offset of the  $n_{\text{bound}}(\text{Mg}^{2+})$  and  $n_{\text{bound}}(\text{OH}^-)$  profiles after nucleation in Figure 1b of the main text (considering that lower activity coefficients will lead to stronger apparent binding for ideal treatment, as described in detail elsewhere<sup>S3</sup>).

## References

- S1. D. L. Parkhurst, *User's Guide to PHREEQC : a Computer Program for Speciation, Reaction-Path, Advective-Transport, and Inverse Geochemical Calculations*, U.S. Geological Survey, Lakewood, 1995.
- S2. P. Blanc, A. Lassin, P. Piantone, M. Azaroual, N. Jacquemet, A. Fabbri and E. C. Gaucher, *Appl. Geochem.*, 2012, **27**, 2107-2116.
- S3. M. Kellermeier, A. Picker, A. Kempter, H. Cölfen and D. Gebauer, *Adv. Mater.*, 2014, **26**, 752-757.
